# Supplementary material for: Enhanced undecylprodigiosin production using collagen hydrolysate: a cost-effective and high-efficiency synthesis strategy
Source: Royal Society of Chemistry journal article supplement (doi:10.1039/d4tb02171a), 2024-12-21
Supplement: d4tb02171a1.pdf [file d4tb02171a1.pdf]

## Supporting Information

### Enhanced undecylprodigiosin production using collagen hydrolysate:

#### A cost-effective and high-efficiency synthesis strategy

Xia Li<sup>a,b,c</sup>, Xian Liu<sup>a</sup>, Ming Yang<sup>a</sup>, Bo Wang<sup>a</sup>, Yin Tan<sup>a</sup>, Xue-Pin Liao<sup>a,b,c,\*</sup>, Bi Shi<sup>a,b,c</sup>

a College of Biomass Science and Engineering, Sichuan University, Chengdu, 610065, China

b National Engineering Laboratory for Clean Technology of Leather Manufacture, Sichuan University, Chengdu, 610065, China

c The Key Laboratory of Leather Chemistry and Engineering of Ministry of Education, Sichuan University, Chengdu 610065, China

#### **\*Corresponding author**

Prof. Xue-pin Liao

## **Section 1: Supplementary Notes 1-4**

### **Supplementary Note 1: Effect of COH on pH value**

The pH value was increased when 2% COH was added into GM medium, and the pH value in GM\_2COH media at 79 h was slightly higher than that in GM media at 120 h, suggesting that COH can influence the metabolism of *Streptomyces* sp. SLL-523 (Fig. S1).

### **Supplementary Note 2: Morphological observation and taxonomic identification**

*Streptomyces* sp. SLL-523 was cultured on the GYM solid medium at 30 °C to observe its phenotype characterization and cellular morphology. The strain was taxonomically identified using 16S rRNA gene sequence analysis, which was performed by PCR amplification with the primers PA (5'-CCGTCGACGAGCTCAGAGTTTGATCCTGGCTCAG-3') and PB (5'-CCCGGGTACCAAGCTTAAGGAGGTGATCCAGCCGCA-3')<sup>1</sup>. Sequencing analysis was carried out by the Beijing Genomics Institute (Beijing, PR China). The 16S rRNA fragments from PCR were submitted to NCBI's BLAST search ([www.blast.ncbi.nlm.nih.gov/Blast.cgi](http://www.blast.ncbi.nlm.nih.gov/Blast.cgi))<sup>2,3</sup> and the EzBioCloud server (<https://www.ezbiocloud.net/>)<sup>4,5</sup> to identify phylogenetic neighbours and calculate pairwise sequence similarities. A phylogenetic tree was generated with the neighbour-joining method from 1000 replicates for bootstrap analysis available in the program MEGA 11.0<sup>6,7</sup>. Kimura's two-parameter model was used to calculate the evolutionary distances<sup>8</sup>.

The strain SLL-523 sporulated on the solid media, which had white to grey spores (Fig. S2a). Meanwhile, the large amounts of diffusible deep red to purple or blue pigments on plates were observed by naked eyes during the cultivation of the strain on the GYM solid medium. The result indicated the strain SLL-523 synthesizes abundant secondary metabolites. Phylogenetic analysis based on 16S rRNA gene sequences indicated that strain SLL-523 belongs to genus *Streptomyces*, showing the highest homology to *Streptomyces anthocyanicus* NBRC 14892, with a 100% similarity (Fig. S2b). Besides, the result was further obtained recognition and support from the morphological feature examined by SEM (Fig. 2c). The air mycelium and spore filaments of the strain SLL-523 were obviously observed. Moreover, the spores were arranged in chains, and the length of spores was 1-2  $\mu\text{m}$ , which showed the typical characteristics of mycelium morphology of *Streptomyces* genus.

### **Supplementary Note 3: Products characterization of *Streptomyces* sp. SLL-523**

The red pigment was extracted from the strain SLL-523 by HCl methanol solution. Actually, undecylprodigiosin (UDP) is a liposoluble red pigment with a tri-pyrrole ring skeleton structure, showing a characteristic absorption peak around 530  $\text{nm}^9$ . When the red pigment extracted from the SLL-523 culture was analyzed by HPLC, the pigment mainly eluted at 14.8 min (Fig. 2d). The major peak pseudomolecular ion was observed at  $m/z$  394.28  $[\text{M}+\text{H}]^+$ , which is agreement with the  $\text{C}_{25}\text{H}_{35}\text{N}_3\text{O}$  molecular formula of UDP ( $m/z$  394.2859  $[\text{M}+\text{H}]^+$ , calc.). Moreover, the LC-MS/MS analysis of the red pigment containing ions  $m/z$  379.26,  $m/z$  362.26,

$m/z$  336.21,  $m/z$  308.18,  $m/z$  266.13,  $m/z$  252.11,  $m/z$  238.10,  $m/z$  222.10,  $m/z$  175.09,  $m/z$  161.07,  $m/z$  134.10 (parent ion:  $m/z$  394.28). All prodigiosin analogues have a common fragment ion at  $m/z$  252, which derives from the loss of the alkyl chain<sup>10</sup>. The most intensive product ion  $m/z$  238.1 is a result of cleavage of the aliphatic side chain. Besides,  $m/z$  379.26 is caused by  $-CH_3$  loss from UDP<sup>9</sup>. These results indicated that the fermentation products of *Streptomyces* sp. SLL-523 contain UDP.

#### **Supplementary Note 4: COG analysis of *Streptomyces* sp. SLL-523**

CDSs from the strain SLL-523 were analyzed and assigned to COG by EggNOG (Fig. 4b). The largest proportion of all genes belonged to the S category (Unknown function genes), which accounted for 24.53% of the entire CDSs, respectively. Genes related to transcription were the second largest COG, with 7.73% for the strain. 339 and 148 genes were assigned to category C (energy production and conversion) and H (coenzyme transport and metabolism). Especially, genes coupled with carbohydrate transport and metabolism (Category G), amino acid transport and metabolism (Category E), and secondary metabolites biosynthesis, transport and catabolism (Category Q), were accounted for 12.29% among the strain SLL-523. These results indicated that a considerable number of genes related to substances transport, substrates utilization and products synthesis were contained in the genomics of the strain SLL-523.

## Section 2: Supplementary Figure S1-S7

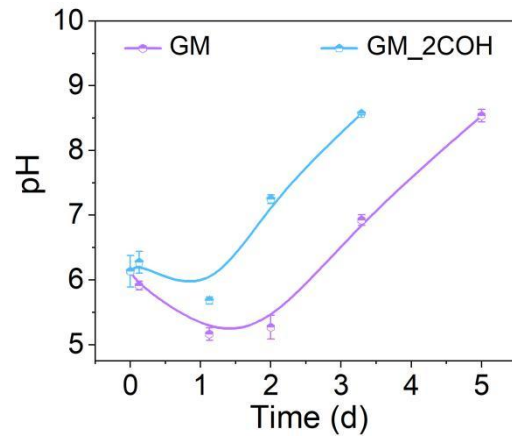

**Fig. S1** pH value changes in GM and GM\_2COH media over time.

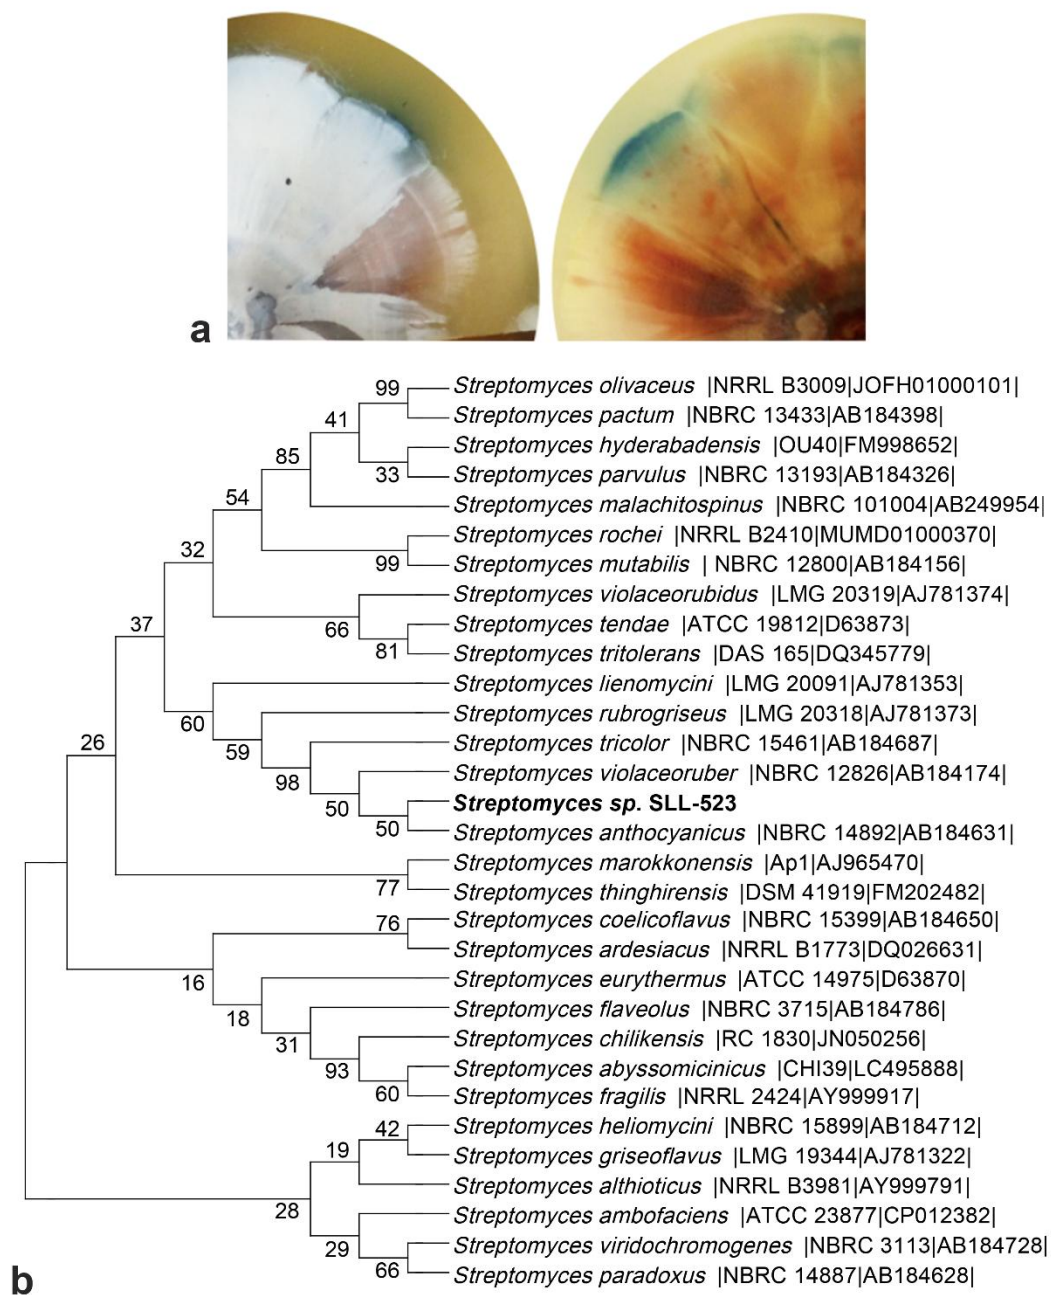

**Fig. S2. Morphological observation and taxonomic identification of *Streptomyces* sp. SLL-523.** (a) Phenotypes characterization of *Streptomyces* sp. SLL-523 on GYM agar medium. (b) Neighbour-joining phylogenetic tree based on 16S rRNA gene sequences, showing the relationship between *Streptomyces* sp. SLL-523 and related taxa. Numbers at branch points are bootstrap values (percentages based on 1000 replications). Bar, 0.001 substitutions per nucleotide position.

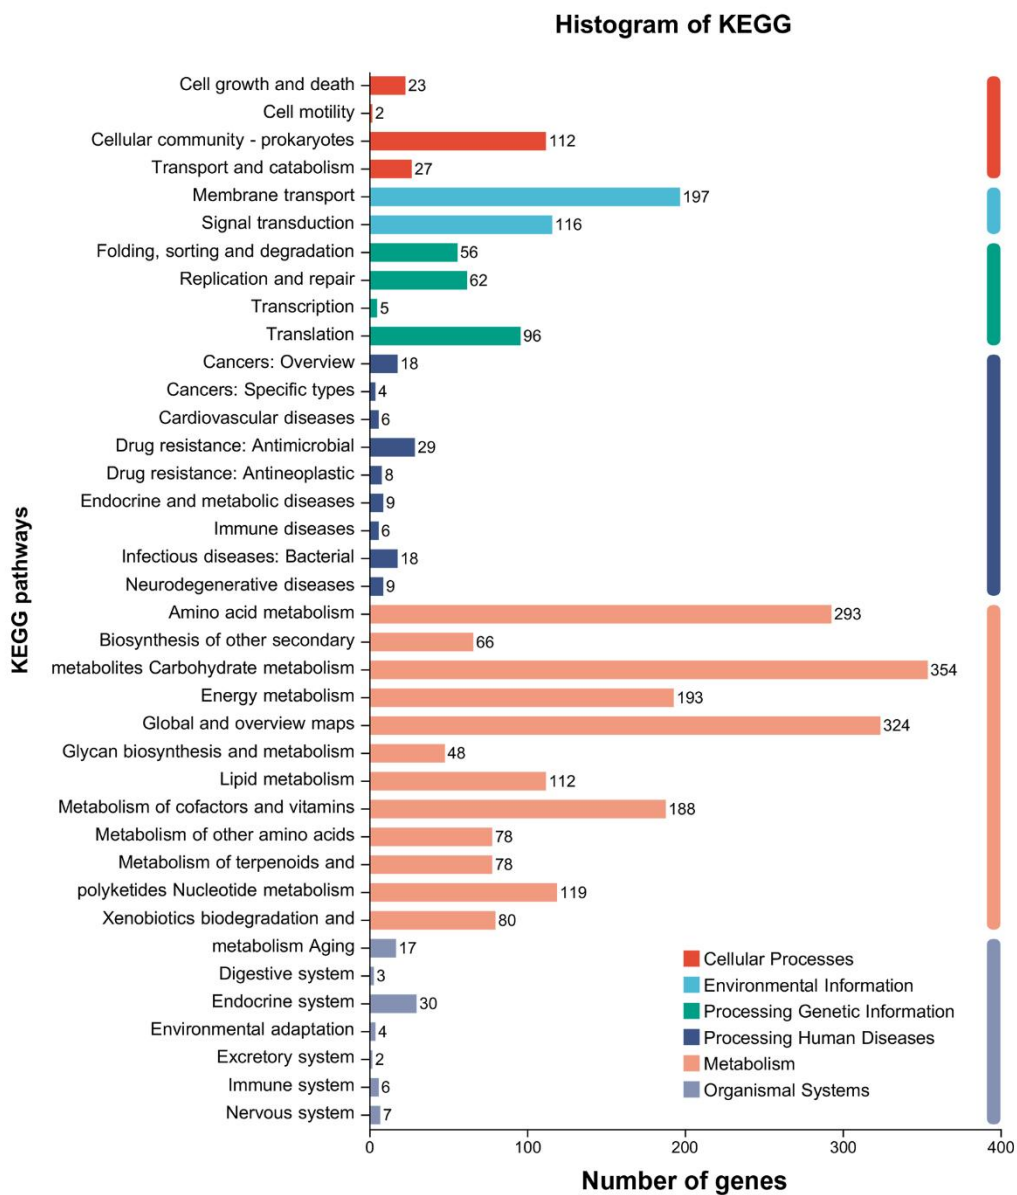

**Fig. S3 KEGG clustering annotation of genes from the strain SLL-523.** The ordinate represents the classification of second level KEGG pathway, and the abscissa represents the number of genes under the annotation of this classification. Different column colors represent the classification of first level KEGG pathway.

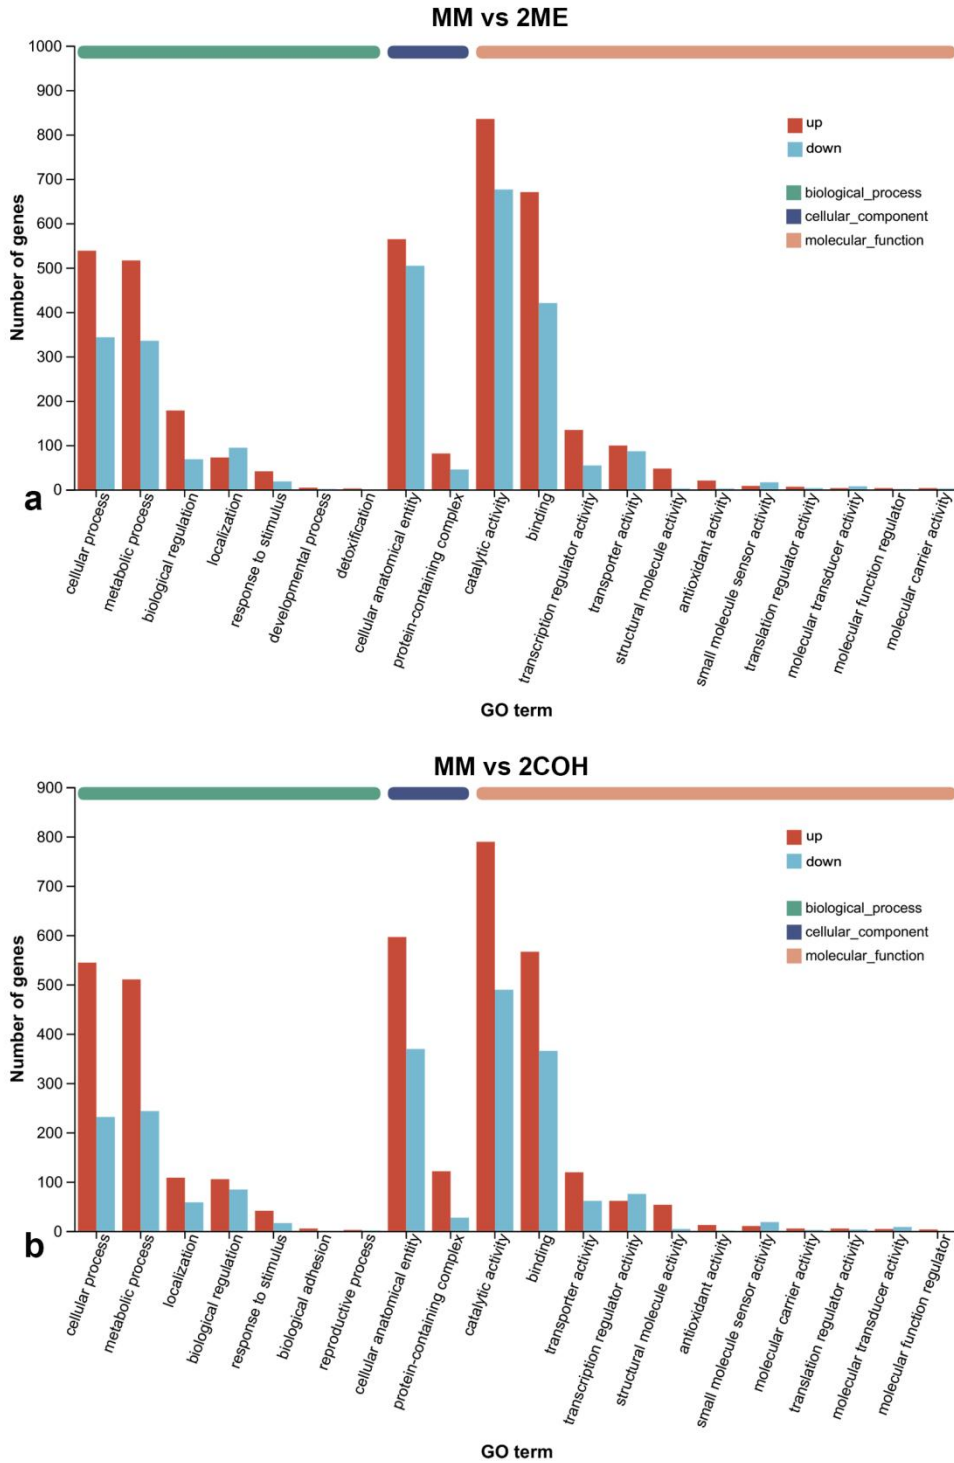

**Fig. S4 Function annotation analysis of the intersection differentially expressed genes (DEGs) of *Streptomyces* sp. SLL-523. (a-b) GO annotation analysis of the DEGs in MM vs 2ME, and MM vs 2COH, respectively. The genes were assigned to three GO categories, biological process, cellular component, and molecular function. The horizontal axis indicated the top 20 ranked GO term of DEGs. The vertical axis represented the genes numbers of each sub-category of GO terms annotated successfully by GO assignment, respectively.**



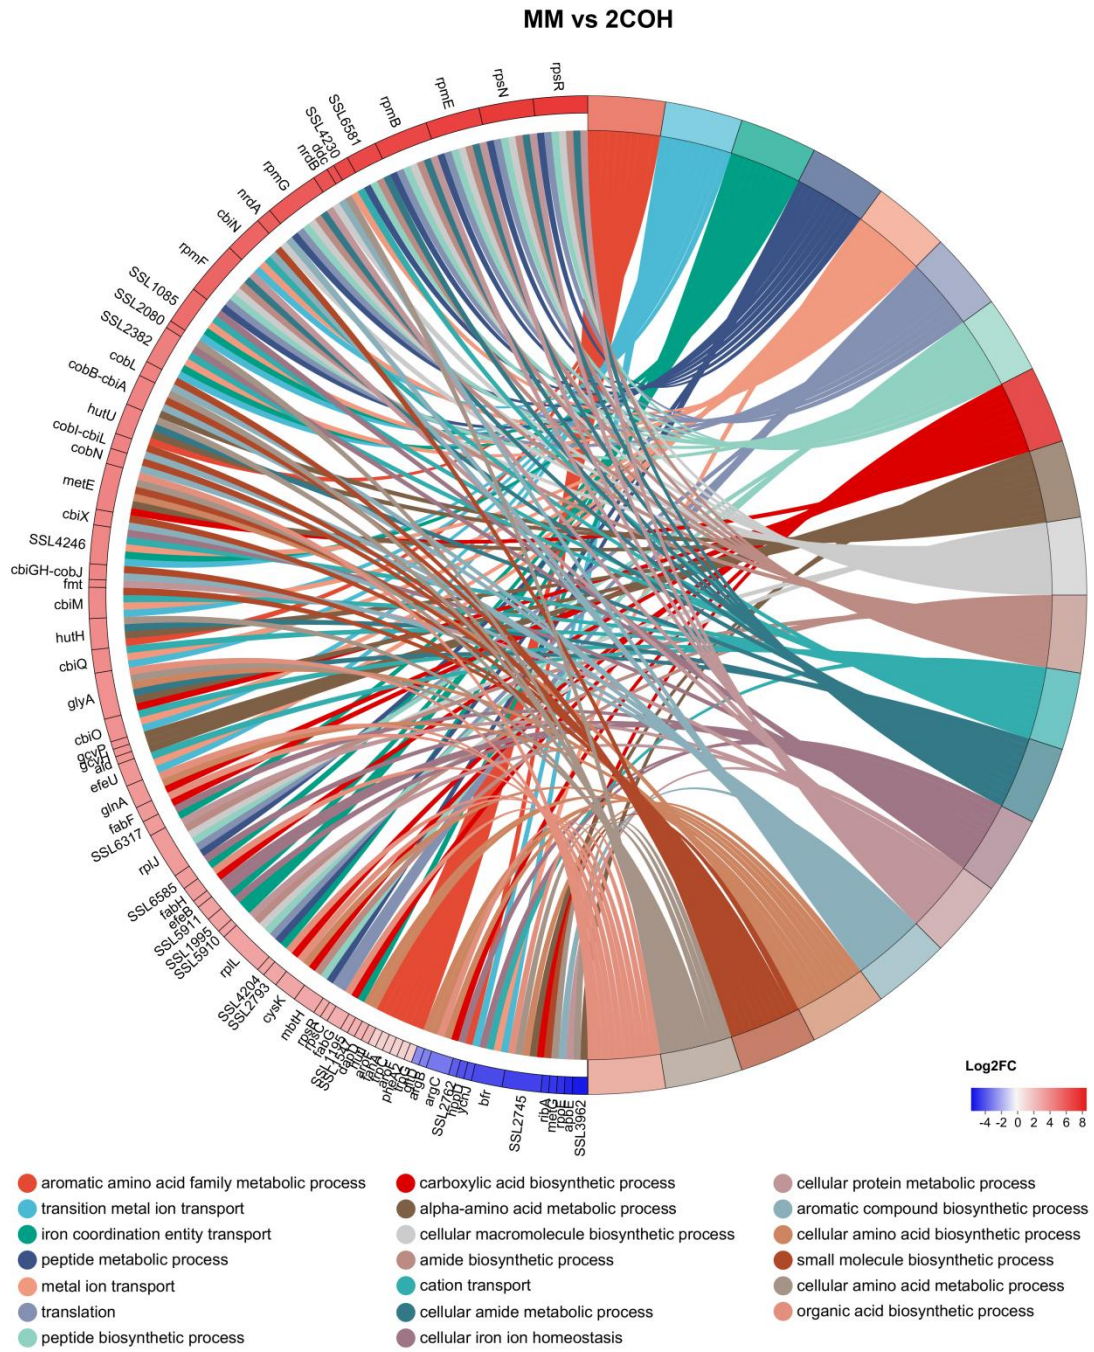

**Fig. S5** GO Chord plot of top 20 ranked over-represented GO terms of DEGs for *Streptomyces* sp. SLL-523 in MM vs 2COH.

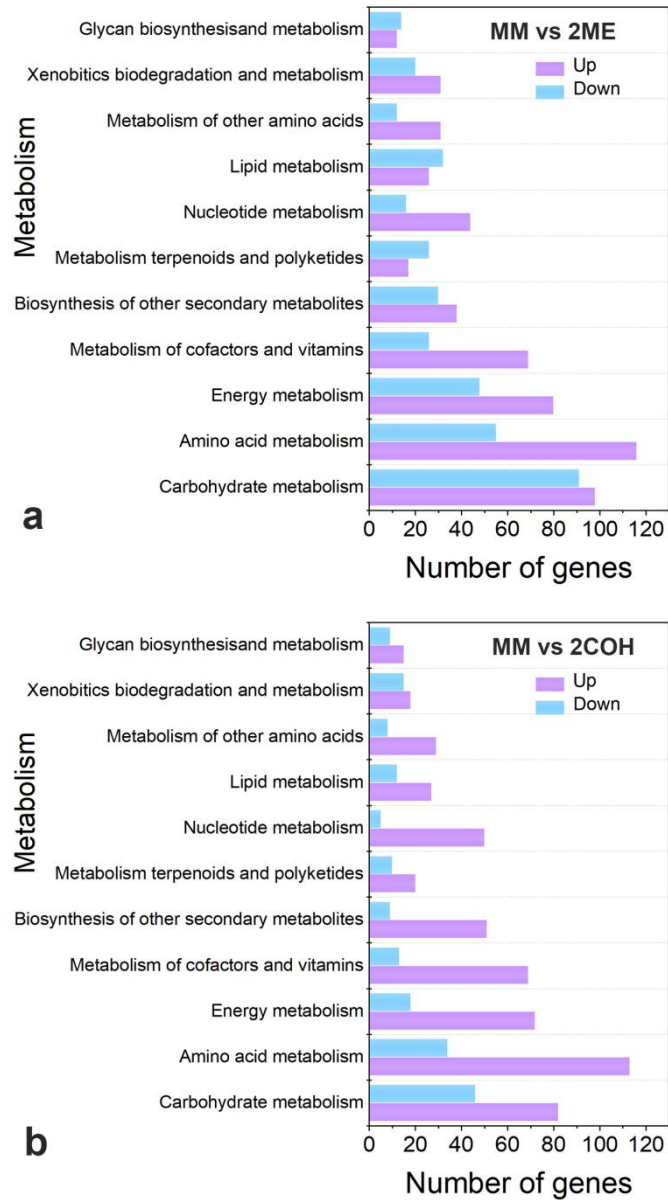

**Fig. S6** Changes in gene expression of *Streptomyces* sp. SLL-523 related to metabolism. (a-b) The DEGs analysis related to metabolism in MM vs 2ME, and MM vs 2COH, respectively.

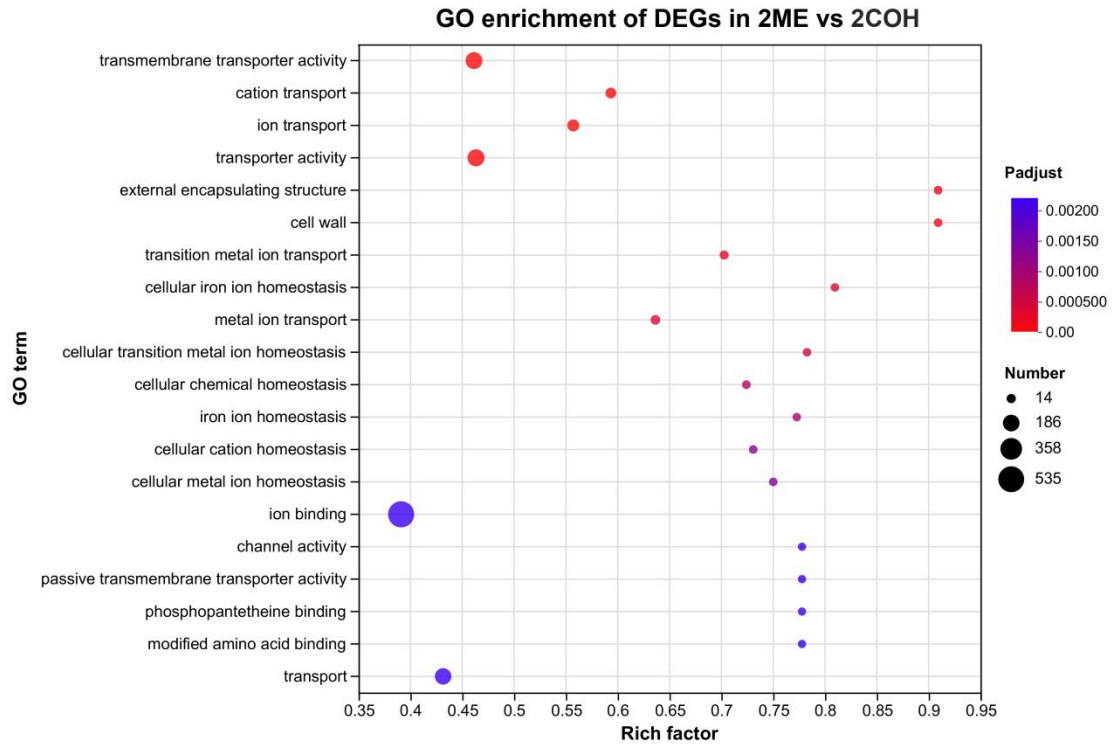

**Fig S7 GO enrichment analysis of the intersection DEGs of the strain SLL-523 in 2ME vs 2COH by bubble diagram.** Bubble diagram of the top 20 ranked GO terms of DEGs in 2ME vs 2COH. The horizontal axis indicated the Rich Factor and the vertical axis represented GO terms. The sizes of dots manifested the number of genes in the GO term. The enrichment degree was higher with a bigger Rich Factor.

### Section 3: Supplementary Table S1-S8

**Table S1. Primers used for mRNA expression analysis by qRT-PCR using SYBR Green.**

| <b>Gene id</b> | <b>Forward primer (5' -3' )</b> | <b>Reverse primer (5' -3' )</b> |
|----------------|---------------------------------|---------------------------------|
| <i>hrdB</i>    | GTCATGGCGCTCATTG                | ACCATCAGCGTCACAC                |
| SSL0392        | GCCACGTCTACCTCAACATCTC          | GGGACTTCATCTGCGTCATCT           |
| SSL0401        | ATGAGCACCACCTACGACAAG           | ATGACGAGCAGCAGTTCCAC            |
| SSL4069        | TCGGCTTCCTGCTCTCCT              | GCCGTACCAGCGGATCA               |
| SSL1211        | CTTCGACATCACCGACTGGG            | AGATCGACGAACCGAACTGC            |
| SSL6492        | CAAGGCGCGGATATCGG               | TGCTGGCCGATCGTGTAGTA            |
| SSL6490        | AGTTCGAGTCCTACAACCCCG           | ATGTCGTTGGCGTTGGTGA             |
| SSL3085        | GCCCTGGCGTTCATCTTCTA            | TTGGTGATGCTGAGGGTGGT            |
| SSL6930        | CCAAGGGCGTCATCAACC              | GTGCGGTACTTCTCGATGTTGT          |
| SSL7396        | TCGAAGTTGATGGCGAAGAC            | ATGTTGCCGAGGACCTTCTT            |
| SSL0396        | GTGACCGAGGACCTCTACAC            | GAGCCTGAGGTGGATGGAG             |
| SSL8172        | TCCTGATCAACTCCAAGGCC            | TACTCGGTCTCCCAGTCCTC            |
| SSL0398        | AGGACTTCACCGAACAGCG             | ACATGAGGAACTCGCGCTT             |
| SSL0409        | CGGCTCCAAGTGCTTCATC             | TAGCAGTCGTCTGAAGTGGAC           |

**Table S2. Genomic information of the strain SLL-523.**

| <b>Features</b>               | <b>Genome</b> |
|-------------------------------|---------------|
| Total Scaffolds Number        | 130           |
| Total bases in Scaffolds (bp) | 8,605,615     |
| Scaffold N50 (bp)             | 245,692       |
| Scaffold N90 (bp)             | 63,021        |
| Largest Scaffold length (bp)  | 618,787       |
| G+C (%)                       | 72.20         |
| Genes number                  | 8,163         |
| Gene total length (bp)        | 7,548,672     |
| Gene average length (bp)      | 924.73        |
| Gene density                  | 0.95          |
| tRNA                          | 62            |
| rRNA                          | 4             |

**Table S3. Summary of genes involved in the pathway of Gly and Ser.**

| Gene id | KO id  | KO name | KO description                                                     |
|---------|--------|---------|--------------------------------------------------------------------|
| SSL0052 | K15634 | gpmB    | probable phosphoglycerate mutase [EC:5.4.2.12]                     |
| SSL0497 | K00836 | ectB    | diaminobutyrate-2-oxoglutarate transaminase [EC:2.6.1.76]          |
| SSL0637 | K00133 | asd     | aspartate-semialdehyde dehydrogenase [EC:1.2.1.11]                 |
| SSL0638 | K00928 | lysC    | aspartate kinase [EC:2.7.2.4]                                      |
| SSL0958 | K01758 | -       | cystathionine gamma-lyase [EC:4.4.1.1]                             |
| SSL1168 | K15634 | gpmB    | probable phosphoglycerate mutase [EC:5.4.2.12]                     |
| SSL1289 | K00382 | lpd     | dihydrolipoamide dehydrogenase [EC:1.8.1.4]                        |
| SSL1327 | K00865 | glxK    | glycerate 2-kinase [EC:2.7.1.165]                                  |
| SSL1442 | K01696 | trpB    | tryptophan synthase beta chain [EC:4.2.1.20]                       |
| SSL1443 | K01695 | trpA    | tryptophan synthase alpha chain [EC:4.2.1.20]                      |
| SSL1465 | K13745 | ddc     | L-2,4-diaminobutyrate decarboxylase [EC:4.1.1.86]                  |
| SSL1810 | K01754 | ilvA    | threonine dehydratase [EC:4.3.1.19]                                |
| SSL1874 | K00382 | lpd     | dihydrolipoamide dehydrogenase [EC:1.8.1.4]                        |
| SSL2137 | K15634 | gpmB    | probable phosphoglycerate mutase [EC:5.4.2.12]                     |
| SSL2530 | K01620 | ltaE    | threonine aldolase [EC:4.1.2.48]                                   |
| SSL2837 | K00281 | gcvP    | glycine dehydrogenase [EC:1.4.4.2]                                 |
| SSL3049 | K17103 | pssA    | CDP-diacylglycerol---serine O-phosphatidyltransferase [EC:2.7.8.8] |
| SSL3050 | K00865 | glxK    | glycerate 2-kinase [EC:2.7.1.165]                                  |
| SSL4288 | K00003 | -       | homoserine dehydrogenase [EC:1.1.1.3]                              |
| SSL4740 | K01697 | -       | cystathionine beta-synthase [EC:4.2.1.22]                          |
| SSL5135 | K01079 | serB    | phosphoserine phosphatase [EC:3.1.3.3]                             |
| SSL5196 | K06718 | ectA    | L-2,4-diaminobutyric acid acetyltransferase [EC:2.3.1.178]         |
| SSL5197 | K00836 | ectB    | diaminobutyrate-2-oxoglutarate transaminase [EC:2.6.1.76]          |
| SSL5198 | K06720 | ectC    | L-ectoine synthase [EC:4.2.1.108]                                  |
| SSL5199 | K10674 | ectD    | ectoine hydroxylase [EC:1.14.11.-]                                 |

|                |        |       |                                                                            |
|----------------|--------|-------|----------------------------------------------------------------------------|
| <b>SSL5402</b> | K00133 | asd   | aspartate-semialdehyde dehydrogenase<br>[EC:1.2.1.11]                      |
| <b>SSL5456</b> | K01754 | ilvA  | threonine dehydratase [EC:4.3.1.19]                                        |
| <b>SSL5531</b> | K15634 | gpmB  | probable phosphoglycerate mutase [EC:5.4.2.12]                             |
| <b>SSL5704</b> | K00130 | betB  | betaine-aldehyde dehydrogenase [EC:1.2.1.8]                                |
| <b>SSL5715</b> | K00130 | betB  | betaine-aldehyde dehydrogenase [EC:1.2.1.8]                                |
| <b>SSL5814</b> | K00003 | -     | homoserine dehydrogenase [EC:1.1.1.3]                                      |
| <b>SSL5815</b> | K01733 | thrC  | threonine synthase [EC:4.2.3.1]                                            |
| <b>SSL5816</b> | K00872 | thrB1 | homoserine kinase [EC:2.7.1.39]                                            |
| <b>SSL5825</b> | K00600 | glyA  | glycine hydroxymethyltransferase [EC:2.1.2.1]                              |
| <b>SSL6154</b> | K01754 | ilvA  | threonine dehydratase [EC:4.3.1.19]                                        |
| <b>SSL6482</b> | K01752 | sdaA  | L-serine dehydratase [EC:4.3.1.17]                                         |
| <b>SSL6483</b> | K00600 | glyA  | glycine hydroxymethyltransferase [EC:2.1.2.1]                              |
| <b>SSL6484</b> | K02437 | gcvH  | glycine cleavage system H protein                                          |
| <b>SSL6485</b> | K00605 | gcvT  | aminomethyltransferase [EC:2.1.2.10]                                       |
| <b>SSL6556</b> | K15634 | gpmB  | probable phosphoglycerate mutase [EC:5.4.2.12]                             |
| <b>SSL6584</b> | K13745 | ddc   | L-2,4-diaminobutyrate decarboxylase [EC:4.1.1.86]                          |
| <b>SSL6722</b> | K01733 | thrC  | threonine synthase [EC:4.2.3.1]                                            |
| <b>SSL6898</b> | K01834 | gpmA  | 2,3-bisphosphoglycerate-dependent<br>phosphoglycerate mutase [EC:5.4.2.11] |
| <b>SSL6925</b> | K00058 | serA  | D-3-phosphoglycerate dehydrogenase<br>[EC:1.1.1.95]                        |
| <b>SSL7114</b> | K00600 | glyA  | glycine hydroxymethyltransferase [EC:2.1.2.1]                              |
| <b>SSL7124</b> | K00130 | betB  | betaine-aldehyde dehydrogenase [EC:1.2.1.8]                                |
| <b>SSL7636</b> | K00058 | serA  | D-3-phosphoglycerate dehydrogenase<br>[EC:1.1.1.95]                        |
| <b>SSL7675</b> | K00273 | aaO   | D-amino-acid oxidase [EC:1.4.3.3]                                          |
| <b>SSL7718</b> | K00382 | lpd   | dihydrolipoamide dehydrogenase [EC:1.8.1.4]                                |
| <b>SSL7887</b> | K00058 | serA  | D-3-phosphoglycerate dehydrogenase<br>[EC:1.1.1.95]                        |
| <b>SSL7931</b> | K00639 | kbl   | glycine C-acetyltransferase [EC:2.3.1.29]                                  |
| <b>SSL7932</b> | K00060 | tdh   | threonine 3-dehydrogenase [EC:1.1.1.103]                                   |
| <b>SSL8054</b> | K15633 | gpml  | 2,3-bisphosphoglycerate-independent                                        |

|                |        |      |                                                |
|----------------|--------|------|------------------------------------------------|
|                |        |      | phosphoglycerate mutase [EC:5.4.2.12]          |
| <b>SSL8120</b> | K00831 | serC | phosphoserine aminotransferase [EC:2.6.1.52]   |
| <b>SSL8163</b> | K15634 | gpmB | probable phosphoglycerate mutase [EC:5.4.2.12] |



**Table S4. Change of main genes expression related to oxidative phosphorylation in MM vs 2ME and 2ME vs 2COH.**

| Gene_id | Gene name   | Gene description                         | FC(MM vs 2ME) | FC(2ME vs 2COH) |
|---------|-------------|------------------------------------------|---------------|-----------------|
| SSL4367 | <i>nuoH</i> | NADH-quinone oxidoreductase subunit H    | 0.046         | 22.578          |
| SSL4361 | <i>nuoN</i> | NADH:ubiquinone oxidoreductase subunit N | 0.048         | 18.272          |
| SSL4363 | <i>nuoL</i> | NADH-quinone oxidoreductase subunit L    | 0.056         | 15.855          |
| SSL4366 | <i>nuoI</i> | NADH-quinone oxidoreductase subunit I 1  | 0.086         | 15.373          |
| SSL5832 | <i>atpA</i> | ATP synthase subunit alpha               | 0.307         | 14.698          |
| SSL4365 | <i>nuoJ</i> | NADH:ubiquinone oxidoreductase subunit J | 0.062         | 14.603          |
| SSL4368 | <i>nuoG</i> | NADH-quinone oxidoreductase subunit G    | 0.058         | 14.505          |
| SSL5831 | <i>atpH</i> | ATP synthase subunit delta               | 0.296         | 14.444          |
| SSL5830 | <i>atpF</i> | ATP synthase F <sub>0</sub> 2C B subunit | 0.314         | 13.805          |
| SSL5834 | <i>atpD</i> | ATP synthase subunit beta                | 0.562         | 13.197          |
| SSL4362 | <i>nuoM</i> | NADH-quinone oxidoreductase subunit M    | 0.054         | 11.656          |
| SSL5833 | <i>atpG</i> | ATP synthase subunit gamma               | 0.503         | 11.452          |
| SSL4364 | <i>nuoK</i> | NADH-quinone oxidoreductase subunit K 2  | 0.065         | 10.728          |
| SSL5828 | <i>atpB</i> | ATP synthase F <sub>0</sub> subunit A    | 0.254         | 8.504           |
| SSL5829 | <i>atpE</i> | ATP synthase subunit C                   | 0.305         | 8.126           |
| SSL4370 | <i>nuoE</i> | NADH-quinone oxidoreductase subunit E    | 0.111         | 7.456           |

|                |             |                                                           |       |       |
|----------------|-------------|-----------------------------------------------------------|-------|-------|
| <b>SSL4371</b> | <i>nuoD</i> | NADH-quinone<br>oxidoreductase<br>subunit D 2             | 0.161 | 6.648 |
| <b>SSL4373</b> | <i>nuoB</i> | NADH-quinone<br>oxidoreductase<br>subunit B 1             | 0.279 | 4.013 |
| <b>SSL4369</b> | <i>nuoF</i> | NADH-quinone<br>oxidoreductase<br>subunit F               | 0.171 | 3.703 |
| <b>SSL4372</b> | <i>nuoC</i> | NADH-quinone<br>oxidoreductase<br>subunit C               | 0.274 | 2.751 |
| <b>SSL5835</b> | <i>atpC</i> | ATP synthase epsilon chain                                | 1.737 | 2.65  |
| <b>SSL4374</b> | <i>nuoA</i> | NADH dehydrogenase                                        | 0.424 | 2.059 |
| <b>SSL0984</b> | <i>cydB</i> | cytochrome c oxidase assembly<br>protein                  | 1.207 | 1.875 |
| <b>SSL7823</b> | <i>ppk</i>  | PPK_STRCO RecName                                         | 2.187 | 1.872 |
| <b>SSL3323</b> | <i>sdhB</i> | fumarate reductase iron-sulfur<br>subunit                 | 0.063 | 1.623 |
| <b>SSL3322</b> | <i>sdhA</i> | succinate dehydrogenase<br>flavoprotein subunit           | 0.11  | 1.511 |
| <b>SSL3615</b> | <i>ndh</i>  | dehydrogenase                                             | 0.274 | 1.506 |
| <b>SSL5427</b> | <i>ndh</i>  | oxidoreductase                                            | 0.485 | 1.367 |
| <b>SSL1322</b> | <i>qcrC</i> | cystathionine beta-lyase                                  | 4.048 | 1.344 |
| <b>SSL3635</b> | <i>qcrB</i> | menaquinol-cytochrome c<br>reductase cytochrome b subunit | 0.315 | 1.162 |
| <b>SSL7095</b> | <i>sdhA</i> | succinate dehydrogenase<br>flavoprotein subunit           | 2.817 | 1.153 |
| <b>SSL3019</b> | <i>ndh</i>  | dehydrogenase                                             | 1.046 | 1.131 |
| <b>SSL8077</b> | <i>nuoN</i> | NADH-quinone<br>oxidoreductase<br>subunit N               | 3.423 | 1.13  |
| <b>SSL0983</b> | <i>cydA</i> | cytochrome ubiquinol oxidase<br>subunit I                 | 2.661 | 1.128 |

|                |                |                                                      |         |       |       |
|----------------|----------------|------------------------------------------------------|---------|-------|-------|
| <b>SSL1317</b> | <i>coxA</i>    | cytochrome ubiquinol oxidase subunit I               |         | 7.788 | 1.115 |
| <b>SSL1323</b> | <i>qcrA</i>    | ubiquinol-cytochrome reductase iron-sulfur subunit   | c       | 4.182 | 1.076 |
| <b>SSL7094</b> | <i>sdhD</i>    | succinate dehydrogenase                              |         | 2.102 | 1.057 |
| <b>SSL8075</b> | <i>nuoL</i>    | NADH dehydrogenase                                   |         | 2.287 | 1.04  |
| <b>SSL8076</b> | <i>nuoM</i>    | NADH-quinone oxidoreductase subunit M                |         | 2.122 | 1.026 |
| <b>SSL6839</b> | <i>ndh</i>     | NADH dehydrogenase                                   |         | 0.411 | 0.91  |
| <b>SSL7093</b> | <i>sdhC</i>    | Succinate dehydrogenase cytochrome b-556 subunit     |         | 2.041 | 0.898 |
| <b>SSL8071</b> | <i>nuoH</i>    | NADH dehydrogenase                                   |         | 2.419 | 0.878 |
| <b>SSL3743</b> | <i>SSL3743</i> | polyphosphate kinase 2                               |         | 0.647 | 0.852 |
| <b>SSL1324</b> | <i>qcrB</i>    | ubiquinol-cytochrome reductase cytochrome b subunit  | c       | 6.762 | 0.851 |
| <b>SSL2949</b> | <i>nuoF</i>    | NAD-dependent dehydrogenase gamma subunit            | formate | 0.279 | 0.851 |
| <b>SSL5616</b> | <i>ppa</i>     | Inorganic pyrophosphatase                            |         | 2.457 | 0.834 |
| <b>SSL5599</b> | <i>nuoD</i>    | NADH-ubiquinone oxidoreductase chain D               |         | 4.389 | 0.818 |
| <b>SSL5264</b> | <i>SSL5264</i> | cytochrome b561                                      |         | 2.632 | 0.8   |
| <b>SSL7096</b> | <i>sdhB</i>    | succinate dehydrogenase iron-sulfur subunit          |         | 4.6   | 0.796 |
| <b>SSL8072</b> | <i>nuoI</i>    | NADH-quinone oxidoreductase subunit I 2              |         | 5.171 | 0.762 |
| <b>SSL8073</b> | <i>nuoJ</i>    | NADH dehydrogenase                                   |         | 2.063 | 0.762 |
| <b>SSL5513</b> | <i>qcrB</i>    | menaquinol-cytochrome reductase cytochrome b subunit | c       | 1.329 | 0.76  |
| <b>SSL1321</b> | <i>coxC</i>    | cytochrome c oxidase subunit 3                       |         | 4.236 | 0.739 |

|                |             |                                                 |        |       |
|----------------|-------------|-------------------------------------------------|--------|-------|
| <b>SSL1316</b> | <i>coxB</i> | cytochrome c oxidase subunit 2                  | 7.514  | 0.717 |
| <b>SSL1916</b> | <i>sdhA</i> | succinate dehydrogenase<br>flavoprotein subunit | 39.846 | 0.685 |
| <b>SSL4723</b> | <i>ndh</i>  | NADH dehydrogenase                              | 2.212  | 0.516 |
| <b>SSL8074</b> | <i>nuoK</i> | NADH-quinone oxidoreductase<br>subunit K 1      | 2.693  | 0.509 |
| <b>SSL8069</b> | <i>nuoB</i> | NADH-quinone oxidoreductase<br>subunit B 2      | 2.589  | 0.504 |
| <b>SSL8068</b> | <i>nuoA</i> | NADH-quinone oxidoreductase<br>subunit A        | 3.518  | 0.496 |
| <b>SSL1917</b> | <i>sdhC</i> | cytochrome B subunit                            | 45.972 | 0.483 |
| <b>SSL1915</b> | <i>sdhB</i> | succinate dehydrogenase                         | 49.002 | 0.451 |
| <b>SSL5268</b> | <i>cyoE</i> | protoheme IX farnesyltransferase                | 6.939  | 0.444 |
| <b>SSL5515</b> | <i>coxA</i> | cytochrome ubiquinol oxidase<br>subunit I       | 1.068  | 0.431 |
| <b>SSL3623</b> | <i>sdhA</i> | oxidoreductase                                  | 0.822  | 0.417 |

**Table S5. Change of main genes expression related to ABC transporter in MM vs 2ME and 2ME vs 2COH.**

| Gene_id | Gene name    | Gene description                       | FC(MM vs 2ME) | FC(2ME vs 2COH) |
|---------|--------------|----------------------------------------|---------------|-----------------|
| SSL1211 | <i>oleC5</i> | ABC transporter                        | 0.189         | 17.168          |
| SSL4068 | <i>znuC</i>  | ABC transporter                        | 0.599         | 15.831          |
| SSL4069 | <i>znuB</i>  | ABC transporter                        | 0.457         | 24.574          |
| SSL4916 | <i>tagG</i>  | ABC transporter                        | 0.386         | 6.656           |
| SSL8050 | <i>pstB</i>  | ABC transporter                        | 2.703         | 0.198           |
| SSL8052 | <i>pstS</i>  | ABC transporter                        | 2.417         | 0.282           |
| SSL0272 | <i>xylG</i>  | ABC transporter protein<br>ATP-binding | 4.275         | 0.341           |
| SSL1143 | <i>ecfA1</i> | ABC transporter protein<br>ATP-binding | 4.42          | 2.992           |
| SSL1472 | <i>livF</i>  | ABC transporter protein<br>ATP-binding | 0.06          | 131.572         |
| SSL1473 | <i>livG</i>  | ABC transporter protein<br>ATP-binding | 0.069         | 115.585         |
| SSL3976 | <i>miaF</i>  | ABC transporter protein<br>ATP-binding | 0.187         | 8.898           |
| SSL0271 | <i>xylH</i>  | ABC transporter permease               | 6.241         | 0.299           |
| SSL1239 | <i>ganP</i>  | ABC transporter permease               | 0.41          | 0.136           |
| SSL1240 | <i>ganQ</i>  | ABC transporter permease               | 0.519         | 0.158           |
| SSL3960 | <i>gguB</i>  | ABC transporter permease               | 0.398         | 2.861           |
| SSL3974 | <i>miaE</i>  | ABC transporter permease               | 0.395         | 4.276           |
| SSL3975 | <i>miaE</i>  | ABC transporter permease               | 0.292         | 4.837           |
| SSL4900 | <i>aglF</i>  | ABC transporter permease               | 0.138         | 7.521           |
| SSL8051 | <i>pstC</i>  | ABC transporter permease               | 3.162         | 0.364           |
| SSL3971 | <i>miaD</i>  | ABC transporter substrate-binding      | 0.286         | 7.166           |

|                |             |                                    |       |         |  |
|----------------|-------------|------------------------------------|-------|---------|--|
|                |             | protein                            |       |         |  |
| <b>SSL3972</b> | <i>mldA</i> | ABC transporter substrate-binding  | 0.101 | 19.193  |  |
|                |             | protein                            |       |         |  |
| <b>SSL4866</b> | <i>dasA</i> | ABC transporter substrate-binding  | 13.27 | 0.056   |  |
|                |             | protein                            |       |         |  |
| <b>SSL4067</b> | <i>znuA</i> | ABC-transporter metal-binding      | 0.69  | 13.969  |  |
|                |             | lipoprotein                        |       |         |  |
| <b>SSL4899</b> | <i>aglE</i> | Alpha-glucosides-binding           | 0.11  | 10.5    |  |
|                |             | periplasmic protein AglE precursor |       |         |  |
| <b>SSL7217</b> | <i>bioY</i> | biotin synthase                    | 1.726 | 6.162   |  |
| <b>SSL1476</b> | <i>livK</i> | branched chain amino acid ABC      | 0.037 | 173.827 |  |
|                |             | transporter substrate-binding      |       |         |  |
|                |             | protein                            |       |         |  |
| <b>SSL1474</b> | <i>livM</i> | branched chain amino acid          | 0.036 | 240.38  |  |
|                |             | transport permease                 |       |         |  |
| <b>SSL7366</b> | <i>livK</i> | branched-chain amino acid ABC      | 1.276 | 0.362   |  |
|                |             | transporter                        |       |         |  |
| <b>SSL1475</b> | <i>livH</i> | branched-chain amino acid ABC      | 0.035 | 204.389 |  |
|                |             | transporter permease               |       |         |  |
| <b>SSL4888</b> | <i>ftsX</i> | cell division protein FtsX         | 1.386 | 2.275   |  |
| <b>SSL0324</b> | <i>cbiM</i> | cobalamin biosynthesis protein     | 0.48  | 59.077  |  |
|                |             | CbiM                               |       |         |  |
| <b>SSL0327</b> | <i>cbiO</i> | cobalt ABC transporter             | 1.104 | 21.188  |  |
| <b>SSL1144</b> | <i>ecfT</i> | cobalt ABC transporter permease    | 1.44  | 3.662   |  |
| <b>SSL0326</b> | <i>cbiQ</i> | cobalt ECF transporter T           | 0.43  | 63.844  |  |
|                |             | component CbiQ                     |       |         |  |
| <b>SSL4653</b> | <i>cbiQ</i> | cobalt ECF transporter T           | 1.969 | 5.767   |  |
|                |             | component CbiQ                     |       |         |  |
| <b>SSL0325</b> | <i>cbiN</i> | cobalt transporter CbiN            | 0.434 | 213.518 |  |

|                |                |                                                                                    |        |        |
|----------------|----------------|------------------------------------------------------------------------------------|--------|--------|
| <b>SSL1212</b> | <i>oleC4</i>   | daunorubicin resistance protein<br>DrrA family ABC transporter ATP-binding protein | 0.158  | 10.345 |
| <b>SSL5725</b> | <i>thiQ</i>    | Fe <sup>2+</sup> ions import ATP-binding protein FbpC                              | 1.232  | 8.448  |
| <b>SSL0523</b> | <i>gluD</i>    | glutamate ABC transporter permease                                                 | 0.346  | 2.1    |
| <b>SSL6315</b> | <i>proV</i>    | glycine/betaine ABC transporter ATP-binding protein                                | 21.191 | 0.092  |
| <b>SSL6314</b> | <i>proW</i>    | glycine/betaine ABC transporter permease                                           | 26.895 | 0.068  |
| <b>SSL3968</b> | <i>mIaD</i>    | hypothetical protein                                                               | 0.136  | 11.556 |
| <b>SSL3969</b> | <i>mIaD</i>    | hypothetical protein                                                               | 0.356  | 3.21   |
| <b>SSL4654</b> | <i>cbiM</i>    | hypothetical protein                                                               | 3.031  | 4.441  |
| <b>SSL5726</b> | <i>thiP</i>    | iron ABC transporter permease                                                      | 1.418  | 6.766  |
| <b>SSL0277</b> | <i>SSL0277</i> | lipoprotein                                                                        | 0.416  | 3.021  |
| <b>SSL1906</b> | <i>dasA</i>    | lipoprotein                                                                        | 1.959  | 0.375  |
| <b>SSL7292</b> | <i>metQ</i>    | lipoprotein                                                                        | 6.381  | 2.33   |
| <b>SSL8222</b> | <i>bmpA</i>    | lipoprotein                                                                        | 1.266  | 6.397  |
| <b>SSL5234</b> | <i>smoG</i>    | mannitol ABC transporter permease                                                  | 0.269  | 3.532  |
| <b>SSL0731</b> | <i>modB</i>    | molybdate ABC transporter permease                                                 | 6.572  | 0.438  |
| <b>SSL0730</b> | <i>modA</i>    | molybdate-binding protein                                                          | 9.846  | 0.284  |
| <b>SSL0220</b> | <i>opuA</i>    | proline/glycine betaine ABC transporter ATP-binding protein                        | 4.696  | 0.127  |
| <b>SSL0273</b> | <i>xyIF</i>    | solute-binding protein                                                             | 3.913  | 0.436  |
| <b>SSL0691</b> | <i>xyIF</i>    | solute-binding protein                                                             | 0.452  | 2.265  |
| <b>SSL0275</b> | <i>SSL0275</i> | sugar ABC transporter permease                                                     | 0.55   | 3.108  |
| <b>SSL0276</b> | <i>SSL0276</i> | sugar ABC transporter permease                                                     | 0.384  | 3.946  |

|                |             |                                                    |       |        |
|----------------|-------------|----------------------------------------------------|-------|--------|
| <b>SSL3182</b> | <i>dasB</i> | sugar ABC transporter permease                     | 0.378 | 3.746  |
| <b>SSL4901</b> | <i>aglG</i> | sugar ABC transporter permease                     | 0.076 | 15.593 |
| <b>SSL1238</b> | <i>cycB</i> | sugar ABC transporter substrate-binding protein    | 0.388 | 0.253  |
| <b>SSL3958</b> | <i>chvE</i> | sugar ABC transporter substrate-binding protein    | 0.284 | 2.878  |
| <b>SSL5232</b> | <i>smoE</i> | sugar ABC transporter substrate-binding protein    | 0.137 | 4.204  |
| <b>SSL2508</b> | <i>lacE</i> | sugar transporter                                  | 0.702 | 0.39   |
| <b>SSL3183</b> | <i>dasA</i> | sugar transporter                                  | 0.552 | 4.684  |
| <b>SSL4865</b> | <i>dasB</i> | sugar transporter membrane protein                 | 1.62  | 0.28   |
| <b>SSL3538</b> | <i>bxIE</i> | sugar-binding lipoprotein                          | 0.257 | 2.284  |
| <b>SSL7348</b> | <i>msmF</i> | sugar-transporter integral membrane protein        | 0.066 | 18.352 |
| <b>SSL4917</b> | <i>tagH</i> | teichoic acid ABC transporter ATP-binding protein  | 0.582 | 7.605  |
| <b>SSL5727</b> | <i>thiB</i> | thiamine ABC transporter substrate-binding protein | 1.421 | 4.528  |
| <b>SSL3959</b> | <i>gguA</i> | xylose ABC transporter ATP-binding protein         | 0.285 | 2.032  |



**Table S6. Change of main genes expression involved in peptide in MM vs 2ME and 2ME vs 2COH.**

| <b>Gene_id</b> | <b>Gene name</b> | <b>Gene description</b>                                           | <b>FC(MM vs 2ME)</b> | <b>FC(2ME vs 2COH)</b> |
|----------------|------------------|-------------------------------------------------------------------|----------------------|------------------------|
| <b>SSL2080</b> | <i>SSL2080</i>   | non-ribosomal peptide synthetase                                  | 0.636                | 97.856                 |
| <b>SSL2079</b> | <i>SSL2079</i>   | non-ribosomal peptide synthetase                                  | 1.145                | 77.301                 |
| <b>SSL0378</b> | <i>SSL0378</i>   | peptide-binding protein, collagenase                              | 0.397                | 32.242                 |
| <b>SSL6433</b> | <i>SSL6433</i>   | lanthionine-containing SapB                                       | 0.169                | 25.38                  |
| <b>SSL8180</b> | <i>SSL8180</i>   | non-ribosomal peptide synthetase                                  | 0.201                | 18.928                 |
| <b>SSL6015</b> | <i>SSL6015</i>   | CDA peptide synthetase III                                        | 0.199                | 17.072                 |
| <b>SSL8187</b> | <i>SSL8187</i>   | non-ribosomal peptide synthetase                                  | 0.31                 | 10.762                 |
| <b>SSL6492</b> | <i>SSL6492</i>   | dipeptide/oligopeptide/nickel ABC transporter ATP-binding protein | 0.43                 | 9.837                  |
| <b>SSL6493</b> | <i>SSL6493</i>   | peptide ABC transporter ATP-binding protein                       | 0.566                | 5.894                  |
| <b>SSL6490</b> | <i>SSL6490</i>   | peptide ABC transporter substrate-binding protein                 | 1.026                | 4.719                  |
| <b>SSL4209</b> | <i>SSL4209</i>   | non-ribosomal peptide synthetase                                  | 6.75                 | 3.249                  |
| <b>SSL4203</b> | <i>pvdA</i>      | peptide monooxygenase                                             | 13.675               | 3.192                  |
| <b>SSL3853</b> | <i>SSL3853</i>   | lantipeptide                                                      | 1.397                | 2.991                  |

|                |                |                                                                   |        |       |
|----------------|----------------|-------------------------------------------------------------------|--------|-------|
| <b>SSL3027</b> | <i>SSL3027</i> | putative acyl-peptide hydrolase                                   | 1.379  | 2.767 |
| <b>SSL3312</b> | <i>SSL3312</i> | peptide ABC transporter ATP-binding protein                       | 0.81   | 2.615 |
| <b>SSL1678</b> | <i>SSL1678</i> | ATP-grasp ribosomal peptide maturase                              | 0.273  | 2.214 |
| <b>SSL3311</b> | <i>SSL3311</i> | dipeptide/oligopeptide/nickel ABC transporter ATP-binding protein | 1.224  | 2.049 |
| <b>SSL0163</b> | <i>SSL0163</i> | peptide ABC transporter substrate-binding protein                 | 1.743  | 0.475 |
| <b>SSL5821</b> | <i>prfA</i>    | peptide chain release factor 1                                    | 3.145  | 0.468 |
| <b>SSL2660</b> | <i>def</i>     | peptide deformylase 2                                             | 2.857  | 0.381 |
| <b>SSL1873</b> | <i>def</i>     | peptide deformylase 1                                             | 4.565  | 0.16  |
| <b>SSL0221</b> | <i>msrB</i>    | peptide-methionine (R)-S-oxide reductase                          | 7.915  | 0.12  |
| <b>SSL6148</b> | <i>msrA</i>    | peptide methionine sulfoxide reductase                            | 16.282 | 0.061 |
| <b>SSL3084</b> | <i>SSL3084</i> | non-ribosomal peptide synthetase                                  | 0.873  | 0.057 |
| <b>SSL3085</b> | <i>SSL3085</i> | non-ribosomal peptide synthetase                                  | 0.882  | 0.049 |

**Table S7. Change of genes expression related to Pro metabolism in MM vs 2ME, and 2ME vs 2COH.**

| Gene id | Gene name   | KO id  | KO name     | Gene description                          | FC(MM vs 2ME) | FC(2ME vs 2COH) |
|---------|-------------|--------|-------------|-------------------------------------------|---------------|-----------------|
| SSL7396 | <i>proS</i> | K01881 | proS        | proline--tRNA ligase                      | 1.166         | 2.165           |
| SSL8174 | <i>proB</i> | K00931 | proB        | glutamate 5-kinase                        | 2.444         | 0.488           |
| SSL8172 | <i>proA</i> | K00147 | proA        | gamma-glutamyl-phosphate reductase        | 2.355         | 0.735           |
| SSL7918 | <i>rocD</i> | K00819 | rocD, OAT   | aspartate aminotransferase family protein | 4.867         | 0.117           |
| SSL7712 | SSL7712     | K00128 | ALDH        | aldehyde dehydrogenase                    | 16.951        | 0.579           |
| SSL7675 | <i>aao</i>  | K00273 | aao         | amino acid oxidase                        | 8.841         | 0.287           |
| SSL7587 | SSL7587     | K01777 | prdF        | proline racemase                          | 0.854         | 37.951          |
| SSL6937 | <i>aguA</i> | K10536 | aguA        | agmatine deiminase                        | 7.104         | 0.114           |
| SSL6930 | SSL6930     | K00294 | -           | 1-pyrroline-5-carboxylate dehydrogenase   | 0.816         | 5.374           |
| SSL6929 | SSL6929     | K00318 | putB, PRODH | proline dehydrogenase                     | 0.952         | 2.526           |
| SSL6708 | <i>speG</i> | K00657 | speG, SAT   | acetyltransferase                         | 1.734         | 0.773           |
| SSL6655 | <i>amiE</i> | K01426 | amiE        | amidase                                   | 0.773         | 0.837           |
| SSL6596 | <i>speB</i> | K01480 | speB        | agmatinase                                | 1.682         | 1.935           |
| SSL5994 | SSL5994     | K00128 | ALDH        | aldehyde dehydrogenase                    | 3.006         | 0.475           |
| SSL5690 | SSL5690     | K00128 | ALDH        | aldehyde dehydrogenase                    | 2.149         | 6.849           |
| SSL5627 | SSL5627     | K00128 | ALDH        | aldehyde dehydrogenase                    | 0.867         | 3.157           |
| SSL5544 | <i>proC</i> | K00286 | proC        | pyrroline-5-carboxylate reductase         | 0.97          | 1.074           |
| SSL4943 | <i>codA</i> | K01485 | codA        | hydrolase                                 | 0.427         | 1.5             |

|                |                |        |                        |                                          |       |        |
|----------------|----------------|--------|------------------------|------------------------------------------|-------|--------|
| <b>SSL4011</b> | <i>speE</i>    | K00797 | speE,<br>SRM,<br>SPE3  | polyamine<br>aminopropyltransferase<br>1 | 0.678 | 1.7    |
| <b>SSL3608</b> | <i>pip</i>     | K01259 | pip                    | hydrolase                                | 0.051 | 11.583 |
| <b>SSL2734</b> | <i>patA</i>    | K09251 | patA                   | aminotransferase                         | 0.07  | 4.027  |
| <b>SSL2672</b> | <i>rocD</i>    | K00819 | rocD,<br>OAT           | ornithine--oxo-acid<br>transaminase      | 0.123 | 97.762 |
| <b>SSL2205</b> | <i>SSL2205</i> | K01470 |                        | creatinine<br>amidohydrolase             | 0.751 | 1.212  |
| <b>SSL2169</b> | <i>amiE</i>    | K01426 | amiE                   | amidase                                  | 2.719 | 0.305  |
| <b>SSL1497</b> | <i>pip</i>     | K01259 | pip                    | proline iminopeptidase                   | 1.384 | 0.613  |
| <b>SSL0681</b> | <i>speE</i>    | K00797 | speE,<br>SRM,<br>SPE3  | polyamine<br>aminopropyltransferase<br>2 | 0.199 | 2.998  |
| <b>SSL0247</b> | <i>speC</i>    | K01581 | ODC1,<br>speC,<br>speF | lysine/ornithine<br>decarboxylase        | 1.123 | 0.093  |

**Table S8. Change of main genes expression related to UDP biosynthesis in MM vs 2ME and 2ME vs 2COH.**

| Gene id | Gene name   | KO id  | KO name                      | Gene description                                                                | FC(MM vs 2ME) | FC(2ME vs 2COH) |
|---------|-------------|--------|------------------------------|---------------------------------------------------------------------------------|---------------|-----------------|
| SSL0396 | SSL0396     | K21792 | <i>redL</i>                  | Polyketide synthase                                                             | 0.096         | 327.907         |
| SSL0397 | SSL0397     | K21780 | <i>pigI</i> ,<br><i>redM</i> | L-proline---[L-prolyl-carrier protein] ligase                                   | 0.156         | 263.326         |
| SSL0392 | <i>pps</i>  | K21787 | <i>pigC</i> ,<br><i>redH</i> | Phosphoenolpyruvate-utilizing enzyme;Prodigiosin synthesizing transferase PigC. | 0.096         | 222.932         |
| SSL0395 | SSL0395     | K21793 | <i>redK</i>                  | Oxidoreductase                                                                  | 0.096         | 188.901         |
| SSL0393 | SSL0393     | K21786 | <i>pigF</i> ,<br><i>redI</i> | Methyltransferase                                                               | 0.12          | 182.623         |
| SSL0399 | SSL0399     | K21781 | <i>pigG</i> ,<br><i>redO</i> | Acyl carrier protein;peptidyl carrier protein.                                  | 0.338         | 137.161         |
| SSL0398 | SSL0398     | K21784 | <i>pigH</i> ,<br><i>redN</i> | 8-amino-7-oxononanoate synthase;4-hydroxy-2,2'-bipyrrole-5-methanol synthase.   | 0.196         | 124.899         |
| SSL0406 | SSL0406     | K21785 | <i>pigM</i> ,<br><i>redV</i> | RedV protein;4-hydroxy-2,2'-bipyrrole-5-methanol dehydrogenase                  | 0.188         | 107.814         |
| SSL0402 | <i>fabF</i> | K21789 | <i>fabF</i> ,<br><i>redR</i> | 3-oxoacyl-[acyl-carrier-protein] synthase; dodecanoy-ACP synthase.              | 0.206         | 85.359          |
| SSL0394 | SSL0394     | K21791 | <i>redJ</i>                  | Thioesterase                                                                    | 0.161         | 74.471          |
| SSL0400 | <i>fabH</i> | K21788 | <i>redP</i>                  | 3-oxoacyl-ACP synthase III; dodecanoy-ACP synthase.                             | 0.237         | 70.807          |
| SSL0401 | <i>acpP</i> | K21790 | <i>acpP</i> ,<br><i>redQ</i> | Acyl carrier protein                                                            | 0.347         | 21.31           |
| SSL0410 | SSL0410     | K21783 | <i>pigJ</i> ,<br><i>redX</i> | Polyketide synthase;beta-ketoacyl ACP synthase.                                 | 0.737         | 6.624           |
| SSL4440 | <i>fabG</i> | K00059 | <i>fabG</i>                  | 3-oxoacyl-ACP reductase                                                         | 0.369         | 5.467           |
| SSL0409 | SSL0409     | K21782 | <i>pigA</i> ,<br><i>redW</i> | Acyl-CoA dehydrogenase; L-prolyl-PCP dehydrogenase.                             | 1.466         | 4.324           |

|                |                |        |             |                                                                               |        |       |
|----------------|----------------|--------|-------------|-------------------------------------------------------------------------------|--------|-------|
| <b>SSL5142</b> | <i>fabG</i>    | K00059 | <i>fabG</i> | Beta-ketoacyl-ACP reductase                                                   | 2.372  | 3.88  |
| <b>SSL5141</b> | <i>fabI</i>    | K00208 | <i>fabI</i> | Enoyl-(Acyl carrier protein) reductase I                                      | 2.265  | 3.396 |
| <b>SSL3939</b> | <i>fabD</i>    | K00645 | <i>fabD</i> | Malonyl coA-acyl carrier protein ;[acyl-carrier-protein] S-malonyltransferase | 1.268  | 1.93  |
| <b>SSL7526</b> | <i>fabG</i>    | K00059 | <i>fabG</i> | 3-oxoacyl-ACP reductase                                                       | 0.946  | 1.356 |
| <b>SSL5482</b> | <i>fabG</i>    | K00059 | <i>fabG</i> | 3-oxoacyl-ACP reductase                                                       | 1.522  | 1.012 |
| <b>SSL0005</b> | <i>SSL0005</i> | K00059 | <i>fabG</i> | Short-chain dehydrogenase; 3-oxoacyl-ACP reductase.                           | 1.329  | 1.008 |
| <b>SSL5160</b> | <i>fabG</i>    | K00059 | <i>fabG</i> | Oxidoreductase; 3-oxoacyl-ACP reductase.                                      | 2.276  | 0.979 |
| <b>SSL2803</b> | <i>fabG</i>    | K00059 | <i>fabG</i> | 3-oxoacyl-ACP reductase                                                       | 0.961  | 0.974 |
| <b>SSL7645</b> | <i>fabG</i>    | K00059 | <i>fabG</i> | 3-ketoacyl-ACP reductase                                                      | 1.544  | 0.922 |
| <b>SSL2802</b> | <i>fabG</i>    | K00059 | <i>fabG</i> | 3-ketoacyl-ACP reductase                                                      | 1.49   | 0.796 |
| <b>SSL4994</b> | <i>fabG</i>    | K00059 | <i>fabG</i> | 3-ketoacyl-ACP reductase                                                      | 17.774 | 0.026 |

## Section 4: Supplementary References

- 1 X. Long, D. Wang, Y. Zou, J. Tian, Y. Tian and X. Liao, *RSC Adv.*, 2019, **9**, 29205–29216.
- 2 S. F. Altschul, W. Gish, W. Miller, E. W. Myers and D. J. Lipman, *J. Mol. Biol.*, 1990, **215**, 403–410.
- 3 G. Zhu, W. Tan, L. Xie, C. Ma, X. Chen, S. Zhang and Y. Wei, *J. Inorg. Biochem.*, 2022, **236**, 111978.
- 4 D. Hu, C. Sun, T. Jin, G. Fan, K. M. Mok, K. Li and S. M.-Y. Lee, *Front. Microbiol.*, 2020, **11**, 1540.
- 5 M. Zhu, Y. He, Y. Li, T. Ren, H. Liu, J. Huang, D. Jiang, T. Hsiang and L. Zheng, *Front. Microbiol.*, 2020, **10**, 3099.
- 6 S. Kumar, G. Stecher and K. Tamura, *Mol. Biol. Evol.*, 2016, **33**, 1870–1874.
- 7 N. Saitou and M. Nei, *Mol. Biol. Evol.*, 1987, **4**, 406–425.
- 8 M. Kimura, *J. Mol. Evol.*, 1980, **16**, 111–120.
- 9 N. Stankovic, V. Radulovic, M. Petkovic, I. Vuckovic, M. Jadranin, B. Vasiljevic and J. Nikodinovic-Runic, *Appl. Microbiol. Biotechnol.*, 2012, **96**, 1217–1231.
- 10 J. S. Lee, Y.-S. Kim, S. Park, J. Kim, S.-J. Kang, M.-H. Lee, S. Ryu, J. M. Choi, T.-K. Oh and J.-H. Yoon, *Appl. Environ. Microbiol.*, 2011, **77**, 4967–4973.
